# Supplementary material
Source: PubMed Central journal article supplement (PMC4982462)
Supplement: NIHMS800968-supplement-supplemental.pdf [file NIHMS800968-supplement-supplemental.pdf]

## Appendix. Articles included in the systematic review of the literature

### Large-vessel vasculitides with Crohn's Disease

1. Anwar, S., Saboeiro, G. R., Yang, A., Hoda, S. F., Ma, X., Bass, A. R., & Erkan, D. (2010). Large-vessel granulomatous vasculitis in Crohn's disease: a clinical pathology conference held by the division of rheumatology at hospital for special surgery. *HSS Journal*, 6(2), 206–13. doi:10.1007/s11420-010-9177-9
2. Ashraf, S., Alkarawi, M., Alokaily, F., Alkushail, A., & Alrobayan, A. (2009). Takayasu's arteritis associated with Crohn's disease: a case report and literature review. *BMJ Case Rep, Epub Mar 2*.
3. Baqir, M., Usman, M. H. U., Adenwalla, H. N., Aziz, S., Noor, F., ul- Islam, T., Hotiana, M. (2007). Takayasu's arteritis with skin manifestations in a patient with inflammatory bowel disease: coincidence or concurrence? *Clin Rheumatol*, 26(6), 996–8. doi:10.1007/s10067-006-0233-2
4. Beau, B., Colasse, W., Le Bihan, G., & Bourreille, J. (1980). [Association of Takayasu's arteritis and inflammatory bowel disease (author's transl)][Article in French]. *Sem Hop*, 56(43-44), 1841–5.
5. Ben Dhaou, B., Aydi, Z., Boussema, F., Baili, L., Ketari, S., Kochbati, S., ... Rokbani, L. (2012). Takayasu et maladie de Crohn, association rare mais non fortuite : à propos d'une nouvelle observation. *J Afr d'Hépatol-Gastroentérol*, 6(3), 234–36.
6. Ben Zineb, N., Zine, S., Bellasfar, M., Mesaad, M., & Sfar, R. (1992). [Association of Takayasu arteritis, Crohn disease and pregnancy]. [Article in French]. *Rev Fr Gynecol Obstet*, 87(12), 591–3.
7. Biagi, P., Castro, R., Campanella, G., Parisi, G., Gobbini, A., & Vedovini, G. (2001). Takayasu's arteritis and Crohn's disease: an unusual association. Report on two cases. *Dig Liver Dis*, 33(6), 487–91.
8. Burke, A. P., Tavora, F., Narula, N., Tomaszewski, J. E., & Virmani, R. (2008). Aortitis and ascending aortic aneurysm: description of 52 cases and proposal of a histologic classification. *Hum Pathol*, 39(4), 514–26. doi:10.1016/j.humpath.2007.08.018
9. Calderón, R., Estrada, S., Ramírez de la Piscina, P., Salvador, M., Zabaleta, S., Enciso, C., ... García-Campos, F. (2010). Infliximab therapy in a patient with refractory ileocolic Crohn's disease and Takayasu arteritis. *Rev Esp Enferm Dig*, 102(2), 145–6.
10. Cheema, A. A., & McNeill, A. J. (2006). Left main coronary artery stenosis associated with aortitis in a patient with Crohn's disease. *Heart*, 92(5), 618. doi:10.1136/hrt.2005.075465
11. Choe, J., Yang, S., Jung, H., Lee, J., Kim, H., Shin, E., ... Min, Y. (1997). A case of Crohn's disease associated with Takaysu's arteritis. *Korean Journal of Gastrointestinal Endoscopy*, 17, 860–5.
12. Daryani, N. E., Habibi, A. N., Bashashati, M., Keramati, M. R., Rafiee, M. J., Ajdarkosh, H., & Azmi, M. (2008). Takayasu's arteritis associated with Crohn's disease: a case report. *J Med Case Rep*, 2, 87–90. doi:10.1186/1752-1947-2-87

13. De Simone, M., Cioffi, U., Quatrini, M., Lemos, A., Ciulla, M., Botti, F., ... Contessini Avesani, E. (2006). Crohn's disease and Takayasu's arteritis: is this association difficult to find out? *Minerva Gastroenterol Dietol*, 52(6), 443–5.
14. Domènech, E., Garcia-Planella, E., OlazÁbal, A., SÁnchez-Delgado, J., Zabana, Y., Bernal, I., ... Gassull, M. A. (2005). Abdominal aortitis associated with Crohn's disease. *Dig Dis Sci*, 50(6), 1122–3. doi:10.1007/s10620-005-2716-4
15. Dumarey, N., Tang, B.-N.-T., Goldman, S., Wautrecht, J.-C., Matos, C., Unger, P., & Nortier, J. (2007). Papillary muscle inflammation in Takayasu's arteritis revealed by FDG-PET. *Eur Heart J*, 28(8), 1011. doi:10.1093/eurheartj/ehl281
16. Enç, F., Yorulmaz, E., Pehlivanođlu, V., Tuncer, I., Kiziltaş, S., & Erbahçeci, A. (2007). Takayasu's arteritis in a case diagnosed as Crohn's disease. *Turk J Gastroenterol*, 18(4), 250–3.
17. Farrant, M.-A., Mason, J. C., Wong, N. A., & Longman, R. J. (2008). Takayasu's arteritis following Crohn's disease in a young woman: any evidence for a common pathogenesis? *World J Gastroenterol*, 14(25), 4087–90. doi:10.3748/wjg.14.4087
18. Friedman, C. J., & Tegtmeyer, C. J. (1979). Crohn's disease associated with Takayasu's Arteritis. *Dig Dis Sci*, 24(12), 954–8.
19. Gobron, C., Kaci, R., Sokol, H., Vahedi, K., Lejoyeux, P., Guillaud, C., ... Bousser, M. (2010). Unilateral carotid granulomatous arteritis and Crohn's disease. *Rev Neurol (Paris)*, 166(5), 542–6.
20. Goldman, M. H., Akl, B., Mafi, S., & Pastore, L. (2000). Granulomatous aortitis presenting as an acute myocardial infarction in Crohn's Disease. *Circulation*, 102(24), 3023–4. doi:10.1161/01.CIR.102.24.3023
21. Gray, R., & Newman, H. (1983). Arteritis associated with Crohn's disease. *Gastrointest Radiol*, 8(1), 53–5.
22. Hall, S., Barr, W., Lie, J., Stanson, A., Kazmier, F., & Hunder, G. (1985). Takayasu arteritis. A study of 32 North American patients. *Medicine (Baltimore)*, 64(2), 89–99.
23. Hilário, M., Terreri, M., Prismich, G., Len, C., Kihara, E., Goldenberg, J., & Solé, D. (1998). Association of ankylosing spondylitis, Crohn's disease and Takayasu's arteritis in a child. *Clin Exp Rheumatol*, 16(1), 92–4.
24. Hoffman, G.S., Merkel, P., Brasington, R.D., Lenschow, D.J., & Liang P (2004). Anti-Tumor Necrosis Factor Therapy in Patients With Difficult to Treat Takayasu Arteritis. *Arthritis Rheum*, 50(7), 2296–304.
25. Houman, M., Doghri, A., Boubaker, J., Kchir, M., Mahdhaoui, A., Filali, A., & Miled, M. (1996). [Takayasu disease in Crohn disease: an exceptional association] [Article in French]. *Ann Gastroenterol Hepatol (Paris)*, 31(6), 337–40.
26. Izumikawa, K., Motoi, N., Takaya, H., Miyamoto, A., Eishi, Y., Yoshimura, K., & Kishi, K. (2011). A case of concurrent sarcoidosis, aortitis syndrome and Crohn's disease. *Intern Med*, 50(23), 2915–7. doi:10.2169/internalmedicine.50.5298
27. Judah, J. R., Hammond, C. J., Polyak, S. F., Drane, W. E., & Valentine, J. F. (2009). The coexistence of crohn's disease and Takayasu arteritis: diagnosis and treatment of combined disease in three patients. *Pract Gastroenterol*, 3, 50–8.

28. Katoh, N., Kubota, M., Shimojima, Y., Ishii, W., Matsuda, M., Akamatsu, T., & Ikeda, S. (2010). Takayasu's arteritis in a patient with Crohn's disease: an unexpected association during Infliximab therapy. *Intern Med*, *49*(2), 179–182. doi:10.2169/internalmedicine.49.2491
29. Kellermayer, R., Jain, A. K., Ferry, G., Deguzman, M. M., & Guillerman, R. P. (2008). Clinical challenges and images in GI. Aortitis as a rare complication of Crohn's disease. *Gastroenterology*, *134*(3), 668, 898. doi:10.1053/j.gastro.2008.01.051
30. Kerr, G., Hallahan, C., Giordano, J., Leavitt, R., Fauci, A., Rottem, M., & Hoffman, G. (1994). Takayasu arteritis. *Ann Intern Med*, *120*(11), 919–29.
31. Kettaneh, A., Prevot, S., Biaggi, A., Stirnemann, J., Fain, O., Hocqueloux, L., ... Thomas, M. (2003). Hyperthyroidism in two patients with Crohn disease and Takayasu arteritis. *Scand J Gastroenterol*, *38*(8), 901–3.
32. Kloudová, M., Tomš, J., Chovanec, V., Vodňansky, P., Eliáš, P., Rejchrt, S., ... Bureš, J. (2005). Takayasu arteritis in Crohn's disease Report of three cases. *Gastroenterologica et Hepatologica*, *3*(3), 92–8.
33. Konopka, C., Braun, S., & Machado, G. (2009). Takayasu's arteritis and Crohn's disease: an unusual association. *J Vasc Bras*, *8*(4), Epub Sep 11, 2009.
34. Kusunoki, R., Ishihara, S., Sato, M., Sumita, Y., Mishima, Y., Okada, M., ... Kinoshita, Y. (2011). Rare case of Takayasu's arteritis associated with Crohn's disease. *Intern Med*, *50*(15), 1581–5. doi:10.2169/internalmedicine.50.5406
35. Lebude, B., Orloff, M., & Coben, R. (2012). Extensive abdominal aortitis in a patient with Crohn's disease. *J Cardiovasc Med*, *13*(9), 587–9. doi:10.2459/JCM.0b013e3283536b12
36. Lenhoff, S., & Mee, A. (1982). Crohn's disease of the colon with Takayasu's arteritis. *Postgrad Med J*, *58*(680), 386–9.
37. Levitsky, J., Harrison, J., & Cohen, R. (2002). Crohn's disease and Takayasu's arteritis. *J Clin Gastroenterol*, *34*(4), 454–6.
38. Levitsky, J., Harrison, J. R., & Cohen, R. D. (2002). Crohn's Disease and Takayasu's Arteritis. *J Clin Gastroenterol*, *34*(4), 454–456. doi:10.1097/00004836-200204000-00016
39. Liu, Y., Fang, Y., Ruan, L., Li, Y., Li, L., & Jiang, L. (2009). Takayasu's arteritis associated with Crohn's disease. *J Zhejiang Univ Sci B*, *10*(8), 631–4. doi:10.1631/jzus.B0820391
40. Minami, N., Nakase, H., Yoshino, T., Yamada, S., Toyonaga, T., Honzawa, Y., ... Chiba, T. (2013). Effect of infliximab on inflammatory bowel disease with Takayasu arteritis: case series and review of the literature. *Clin J Gastroenterol*, *6*(3), 226–30. doi:10.1007/s12328-013-0387-9
41. Nguyen, M., & Kaese, r P. (2011). [Takayasu's disease associated with Crohn's disease: two identical diseases at different sites?]. [Article in French]. *Rev Med Suisse*, *7*(299), 1325–8.
42. Ogawa, K., Matsumoto, T., Yada, S., Hirano, A., Kumagae, Y., Goto, K., ... Lida, M. (2009). A case of Crohn's disease associated with Takayasu's arteritis and Henoch-Schönlein purpura. *Clin J Gastroenterol*, *2*(3), 166–9. doi:10.1007/s12328-009-0062-3

43. Ohta, Y., Ohya, Y., Fujii, K., Tsuchihashi, T., Sato, K., Abe, I., & Iida, M. (2003). Inflammatory diseases associated with Takayasu's arteritis. *Angiology*, *54*(3), 339–44. doi:10.1177/000331970305400310
44. Osman, M., Aaron, S., Noga, M., & Yacyszyn, E. (2011). Takayasu's arteritis progression on anti-TNF biologics: a case series. *Clin Rheumatol*, *30*(5), 703–6. doi:10.1007/s10067-010-1658-1
45. Owyang, C., Miller, L., Lie, J., & Fleming, C. (1979). Takayasu's arteritis in Crohn's disease. *Gastroenterology*, *76*(4), 828–8.
46. Ozsöyler, I., Yilik, L., Bozok, S., Ozbek, C., & Gürbüz, A. (2005). Cardiovascular involvement in Crohn's disease in the absence of ankylosing spondylitis. *Heart Vessels*, *20*(4), 164–6. doi:10.1007/s00380-004-0791-7
47. Pata, G., Nascimbeni, R., Villanacci, V., & Salemi, B. (2007). [Takayasu's arteritis in Crohn's disease: a case report]. [Article in Italian]. *Chir Ital*, *59*(3), 417–21.
48. Ratuapli, S., Mazlumzadeh, M., Gurudu, S., Money, S., & Heigh, R. (2010). Coexisting Crohn's disease and Takayasu's arteritis in two patients treated with anti-TNF- $\alpha$  therapies. *Case Rep Gastroenterol*, *4*(1), 35–40. doi:10.1159/000270919
49. Reimund, J., Duclos, B., Mechine, A., Chenard, M., Bellocq, J., Schutz, J., & Baumann, R. (1997). [Granulomatous involvement of the pancreas in Crohn disease associated with Takayasu arteritis]. [Article in French]. *Gastroenterol Clin Biol*, *21*(5), 437–8.
50. Reny, J., Paul, J., Lefèbvre, C., Champion, K., Emmerich, J., Blétry, O., ... Fiessinger, J. (2003). Association of Takayasu's arteritis and Crohn's disease. Results of a study on 44 Takayasu patients and review of the literature. *Ann Med Interne (Paris)*, *154*(2), 85–90.
51. Rustagi, T., & Majumder, S. (2011). Crohn's-Takayasu's arteritis overlap with hypercoagulability: an optimal milieu for ischemic stroke. *J Dig Dis*, *12*(2), 142–6. doi:10.1111/j.1751-2980.2011.00479.x
52. Sheehan-Dare, R. a., Goodfield, M. J., Wilson, P. D., & Rowell, N. R. (1989). Axillary artery occlusion as a presenting feature of Crohn's disease. *Postgrad Med J*, *65*(768), 758–760. doi:10.1136/pgmj.65.768.758
53. Taddio, A., Maschio, M., Martellosi, S., Barbi, E., & Ventura, A. (2013). Crohn's disease and Takayasu's arteritis: an uncommon association. *World J Gastroenterol*, *19*(35), 5933–5.
54. Teja, K., Crum, C., & Friedman, C. (1980). Giant cell arteritis and Crohn's disease: an unreported association. *Gastroenterology*, *78*(4), 796–802.
55. Todini, A., Heinzmann, M., Antignani, P., & Paiella, M. (1999). Association between Takayasu's arteritis and Crohn's disease in two young women: case reports. *J Mal Vasc*, *24*(5), 373–6.
56. Van Elburg, R., Henar, E., Bijleveld, C., Prins, T., & Heymans, H. (1992). Vascular compromise prior to intestinal manifestations of Crohn's disease in a 14-year-old girl. *J Pediatr Gastroenterol Nutr*, *14*(1), 97–100.
57. Yassinger, S., Adelman, R., Cantor, D., Halsted, C., & Bolt, R. (1976). Association of inflammatory bowel disease and large vascular lesions. *Gastroenterology*, *71*(5), 844–6.

58. Yilmaz, N., Can, M., Alibaz-Oner, F., & Direskeneli, H. (2012). Clinically silent Crohn's disease in a patient with Takayasu's arteritis unresponsive to conventional therapies. *Rheumatology International*, *33*(12), 3091–3. doi:10.1007/s00296-012-2558-2

### Large-vessel vasculitides with Ulcerative Colitis

1. Achar, K., & Al-Nakib, B. (1986). Takayasu's arteritis and ulcerative colitis. *Am J Gastroenterol*, *81*(12), 1215–7.
2. Aoyagi, S., Akashi, H., Kawara, T., Ishihara, K., Tanaka A, Kanaya, S., Koga, Y., & Ishikawa, R. (1998). Aortic root replacement for Takayasu arteritis associated with ulcerative colitis and ankylosing spondylitis-report of a case. *Jpn Circ J*, *62*(1), 64–8.
3. Ariizumi, K., Saka, A., Hashimoto, R., & Tada, Y. (1999). Carotid reconstruction for cerebral ischemia in aortitis syndrome combined with ulcerative colitis. *Japanese Journal of Cardiovascular Surgery*, *28*(5), 339–42.
4. Asano, Y., Morita, S., Iguchi, K., Kasugai, H., Inamori, M., Uchiyama, T., ... Nakajima, A. (2010). Ulcerative colitis with Takayasu disease. *Digestion*, *82*(4), 261. doi:10.1159/000297160
5. Balamtekin, N., Gürakan, F., Ozen, S., Oguz, B., & Talim, B. (2009). Ulcerative colitis associated with Takayasu's arteritis in a child. *Acta Paediatr*, *98*(8), 1368–71. doi:10.1111/j.1651-2227.2009.01330.x
6. Bansal, R., Aggarwal, P., Handa, R., Biswas, A., Bandhu, S., & Wali, J. P. (2003). Ulcerative colitis associated with Takayasu arteritis. *Int J Cardiol*, *88*(1), 91–93. doi:10.1016/S0167-5273(02)00371-6
7. Bejerano, C., Blanco, R., González-Vela, C., Pérez-Martín, I., Martínez-rodríguez, I., Jimenez-Bonilla, J., & González-Gay, M. (2012). Polymyalgia rheumatica as presenting manifestation of vasculitis involving the lower extremities in a patient with ulcerative colitis. *Clin Exp Rheumatol*, *30*(1 Suppl. 70), S110–3.
8. Chae, M. J., Yu, C. W., Lee, S. Y., Jang, D. H., Hyun, J. Y., Jeong, S. J., & Kim, M. H. (2013). Takayasu's disease in a patient with ulcerative colitis. *Korean Circ J*, *43*(2), 135–138.
9. Chapman, R., Dawe, C., Whorwell, P., & Wright, R. (1978). Ulcerative colitis in association with Takayasu's disease. *Am J Dig Dis*, *23*(7), 660–2.
10. Emad, Y., Ragab, Y., El-Marakbi, A., & Mohamed Hanfi, S. (2007). Long-standing ulcerative colitis complicated by right subclavian artery occlusion and upper limbs arteriolitis with digital ischemia. *Internal Journal of Rheumatic Diseases*, *10*(4), 326–9.
11. Fukunaga, K., Sawada, K., Fukuda, Y., Matoba, Y., Onishi, K., Fukui, S., ... Shimoyama, T. (2002). A case report: first case of filtration leukocytapheresis for a patient of aortitis syndrome associated with ulcerative colitis. *Ther Apher*, *6*(1), 93–8.
12. Gearry, R., Carne, P., & Frizelle, F. (2003). Takayasu's arteritis and ulcerative colitis. *N Z Med J*, *116*(1170), 10–12.

13. Gecse, K., Ruzsa, Z., Nagy, F., Wittmann, T., & Molnár, T. (2011). Successful infliximab treatment in a patient with Takayasu arteritis associated with ulcerative colitis or migration does not override genetics. *Inflammatory Bowel Diseases*, *17*(7), E69–70. doi:10.1002/ibd.21731
14. Goto, M., Nakano, I., & Sakai, K. (1991). A case of ulcerative colitis with aortitis syndrome, sacroiliitis, and pancreatic cancer. *Kyushu J Rheumatol*, *10*, 144–7.
15. Hokama, A., Kinjo, F., Arakaki, T., Matayoshi, R., Yonamine, Y., Tomiyama, R., ... Saito, A. (2003). Pulseless hematochezia: Takayasu's arteritis associated with ulcerative colitis. *Intern Med*, *42*(9), 897–8.
16. Horai, Y., Miyamura, T., Shimada, K., Takahama, S., Minami, R., Yamamoto, M., & Suematsu, E. (2011). A case of Takayasu's arteritis associated with human leukocyte antigen A24 and B52 following resolution of ulcerative colitis and subacute thyroiditis. *Intern Med*, *50*(2), 151–154.
17. Horai, Y., Satoru, O., Lapalme-Remis, S., Sumiyoshi, R., Nakashima, Y., Suzuki, T., ... Kawakami, A. (2013). Takayasu arteritis developing during treatment of ulcerative colitis with infliximab. *Mod Rheumatol*, *23*(3), 572–6. doi:10.1007/s10165-012-0684-z
18. Ichikawa, M., Onizuka, T., Ichikawa, K., Ohama, A., Takahara, O., & Hoshino, H. (1988). [A case of ulcerative colitis associated with Takayasu's arteritis]. [Article in Japanese]. *Nihon Shokakibyō Gakkai Zasshi*, *85*(9), 1690–3.
19. Ikenaga, H., Ogihara, T., Iyori, S., Kou, S., Yoshikawa, H., & Okura, M. M. (1989). Does a common pathophysiological basis exist in the association of ulcerative colitis and Takayasu's aortitis? - Report of a case. *Postgrad Med J*, *65*(768), 761–764. doi:10.1136/pgmj.65.768.761
20. Inagaki, T., Kiyokawa, T., Naganuma, H., Hashimoto, K., Morikawa, T., & Hano, H. (2010). Takayasu arteritis associated with nonspecific interstitial pneumonia and ulcerative colitis. *Jikeikai Med J*, *57*(1), 33–8.
21. Ishikawa, H., Kondo, Y., Yusa, Y., Ejiri, Y., Sato, Y., Miyata, M., ... Suzuki, T. (1993). An autopsy case of ulcerative colitis associated with Takayasu's disease with a review of 13 Japanese cases. *Gastroenterol Jpn*, *28*(1), 110–7.
22. Ito, Y., Kume, H., Goto, K., Ichikawa, M., Nishiyama, O., Kato, K., ... Yamaki, K. (2001). [Aortitis syndrome associated with ulcerative colitis, preceded by pulmonary infarction involvement]. [Article in Japanese]. *Nihon Kokyūki Gakkai Zasshi*, *39*(4), 287–92.
23. Jacob, A., Ledingham, J. G., Kerr, A. I. G., & Ford, M. J. (1990). Ulcerative colitis and giant cell arteritis associated with sensorineural deafness. *J Laryngol Otol*, *104*(11), 889–90.
24. Kashima, K., Kawasaki, D., Yotsumoto, G., Hatake, S., Yamashita, E., Nagayoshi, S., ... Sonoda, M. (2010). Rapid progression of aortic regurgitation with thoracic aortic aneurysm due to Takayasu arteritis associated with ulcerative colitis. *Intern Med*, *49*(11), 1007–11. doi:10.2169/internalmedicine.49.3122
25. Katsinelos, P., Tsolkas, P., Beltsis, A., Chatzimavroudis, G., Papaziogas, B., Kapelidis, P., ... Paroutoglou, G. (2005). Takayasu's arteritis and ulcerative colitis in a young non-Asian woman: a rare association. *Vasa*, *34*(4), 272–4.
26. Kawasaki, K. (1964). A case of ulcerative colitis associated with symptoms of multiple arterial stenosis. *J Jpn Soc Internal Med*, *53*, 588.

27. Kawashima, M., Koike, R., Nanki, T., Kohsaka, H., Kubota, T., & Miyasaka, N. (1999). A case of Takayasu's arteritis with ulcerative colitis diagnosed by carotodynia and MRI findings. *Nihon Rinsho Meneki Gakkai Kaishi*, 22(5), 317–23.
28. Kerr, G., Hallahan, C., Giordano, J., Leavitt, R., Fauci, A., Rottem, M., & Hoffman, G. (1994). Takayasu arteritis. *Ann Intern Med*, 120(11), 919–29.
29. Kim, G.-B., Kwon, B. S., Bae, E. J., & Noh, C. II. (2012). Takayasu arteritis presenting as dilated cardiomyopathy with left ventricular thrombus in association with ulcerative colitis. *J Am Coll Cardiol*, 60(14), e25.  
doi:10.1016/j.jacc.2011.11.080
30. Koide, K. (1976). The problem of overlapping during collagen diseases and its relative and another autoimmune disorders [in Japanese]. *Jpn J Clin Med*, 34, 1173–7.
31. Kudo, T., Aoyagi, Y., Fujii, T., Ohtsuka, Y., Nagata, S., & Shimizu, T. (2010). Ulcerative colitis and aortitis syndrome. *Pediatr Int*, 52(1), e43–5.  
doi:10.1111/j.1442-200X.2009.02985.x
32. Masuda, H., Ishii, Y., Aoki, N., Nakayama, H., Sato, F., Karube, H., ... Kondo, T. (2002). Ulcerative colitis associated with Takayasu's disease in two patients who received proctocolectomy. *J Gastroenterol*, 37(4), 297–302.
33. Miwa, Y., Nagasako, K., Sasaki, H., Ichikawa, K., Yaguchi, T., Hasegawa, K., & Kubokura, T. (1979). Aortitis syndrome associated with ulcerative colitis: report of a case. *Gastroenterol Jpn*, 14(5), 492–5.
34. Mobini, M., & Hojati, S. (2012). Case report: takayasu arteritis associated with ulcerative colitis. *Govaresh*, 17(1), 60–33.
35. Morita, Y., Yamamura, M., Suwaki, K., Mima, A., Ishizu, T., Hirohata, M., ... Ota, Z. (1996). Takayasu's arteritis associated with ulcerative colitis; genetic factors in this association. *Intern Med*, 35(7), 574–8.
36. Nakano, H., Ikeuchi, H., Uchino, M., Nakamura, M., Noda, M., Yanagi, H., & Yamanura, T. (2004). Takayasu's arteritis associated with ulcerative colitis. *Nippon Daicho Komonbyo Gakkai Zasshi*, 57(7), 396–401.
37. Nishimoto, N., Nakahara, H., Yoshio-Hoshino, N., & Mima, T. (2008). Successful treatment of a patient with takayasu arteritis using a humanized anti-interleukin-6 receptor antibody. *Arthritis Rheum*, 58(4), 1197–200.  
doi:10.1002/art.23373
38. Nishimura, J., Yamada, A., & Araki, H. (1984). A case of Takayasu's disease associated with ulcerative colitis: An important role of HLA-BW52 in its pathogenesis. *Jpn J Soc Internal Med*, 73, 140.
39. Ohta, Y., Ohya, Y., Fujii, K., Tsuchihashi, T., Sato, K., Abe, I., & Iida, M. (2003). Inflammatory diseases associated with Takayasu's arteritis. *Angiology*, 54(3), 339–44. doi:10.1177/000331970305400310
40. Okata, H., Yoshihira, A., & Kawamura, H. (1985). A case of aortitis syndrome associated with ulcerative colitis and pyoderma gangrenosum. *Jpn J Soc Internal Med*, 74, 82.
41. Oyanagi, H., Ishihata, R., Ishikawa, H., Suzuki, S., Kondo, Y., Miyata, M., ... Kodama, N. (1994). Ulcerative colitis associated with Takayasu's disease. *Intern Med*, 33(2), 127–9.

42. Pyo, J. Y., Park, J. S., Song, C. H., Lee, S. W., Park, Y. B., & Lee, S. K. (2013). Takayasu arteritis associated with ulcerative colitis and optic neuritis: first case in Korea. *Korean J Intern Med*, 28(4), 491–6.
43. Sakhuja, V., Gupta, K. L., Bhasin, D. K., Malik, N., & Chugh, K. S. (1990). Takayasu's arteritis associated with idiopathic ulcerative colitis. *Gut*, 31(7), 831–833.
44. Sato, R., Sato, Y., Ishikawa, H., Oshima, Y., Suzuki, T., Watanabe, S., ... Kasukawa, R. (1994). Takayasu's disease associated with ulcerative colitis. *Intern Med*, 33(12), 759–763.
45. Shibata, C., Funayama, Y., Naito, H., Matsuno, & I, S. (2002). Takayasu's arteritis after total proctocolectomy for ulcerative colitis: report of a case. *Dis Colon Rectum*, 45(3), 422–4.
46. So, S., Okabe, N., Maeda, K., Okada, M., Tanaka, M., & Okumura, M. (1995). A case of ulcerative colitis associated with aortitis syndrome [in Japanese]. *Jpn J Gastroenterol*, 92, 175–9.
47. Sood, A., Midha, V., Sood, N., & Bansal, M. (2006). Coexistence of Takayasu's arteritis with ulcerative colitis. *J Assoc Physicians India*, 54, 151–2.
48. Sugishita, T., Kasai, K., & Kituchi, T. (1973). A case of aortitis syndrome associated with ulcerative colitis. *Intern Med*, 31, 517–21.
49. Takahashi, N., Tanabe, K., Sugamori, T., Sato, M., Kitamura, J., Sato, H., ... Shimada, T. (2011). Association between Takayasu arteritis and ulcerative colitis - case report and review of serological HLA analysis. *Med Sci Monit*, 17(7), CS81–4.
50. Tsuchiya, M., Okazaki, I., Mizuno, O., Asakura, H., & Hiramatsu, K. (1976). Aortitis Syndrome associated with ulcerative colitis. *Vasc Surg*, 10(3), 176–81. doi:10.1177/153857447601000309
51. Wakita, A., Sahashi, K., & Noda, A. (1986). A case of aortitis syndrome, developed in the course of ulcerative colitis. *Jpn J Soc Internal Med*, 75, 1341.
52. Watanabe, R., Ishii, T., Nakamura, K., Shirai, T., Fujii, H., Saito, S., & Harigae, H. (2013). Ulcerative colitis is not a rare complication of Takayasu arteritis. *Mod Rheumatol, Epub Jan 1*. doi:10.1007/s10165-012-0827-2
53. Yamaguchi, A., Kitamura, N., Otaki, M., Minoji, T., Tamura, H., & Kurata, A. (1988). [A case of Bentall's operation in annulo aortic ectasia complicated with ulcerative colitis and aortitis syndrome]. [Article in Japanese]. *Jpn J Thoracic Surg*, 36, 578–82.
54. Yamamoto, T., Nanishi, N., & Iida, M. (1977). A case of aortitis syndrome associated with ulcerative colitis. *Jpn J Gastroenterol*, 74, 1780.
55. Yasumura, R., Kawamura, N., & Aizawa, T. (1985). A case of aortitis syndrome associated with hemorrhagic colitis, having a family history of ulcerative colitis [in Japanese]. *Jpn J Gastroenterol*, 82, 707.
56. Yoshida, H., Tomokuni, T., Tamura, K., Watase, K., Matsuwaka, R., & Matsuda, H. (1992). A surgical case of thoracic aortic aneurysm due to Takayasu's aortitis associated with ulcerative colitis. *Nihon Kyōbu Geka Gakkai*, 40(7), 1135–9.

## Cutaneous vasculitides with inflammatory bowel disease



1. Akbulut, S., Ozaslan, E., Topal, F., Albayrak, L., Kayhan, B., & Efe, C. (2008). Ulcerative colitis presenting as leukocytoclastic vasculitis of skin. *World J Gastroenterol*, *14*(15), 2448–50.
2. Borjes, N., Balme, B., & Skowron, F. (2009). Metastatic Crohn's disease - proposition of a clinicopathological correlation. *J Eur Acad Dermatol Venereol*, *23*(10), 1205–6.
3. Burgdorf, W., & Orkin, M. (1981). Granulomatous perivasculitis in Crohn's disease. *Arch Dermatol*, *117*(10), 674–5.
4. Burns, A. M., Walsh, N., & Green, P. J. (2010). Granulomatous vasculitis in Crohn's disease: a clinicopathologic correlate of two unusual cases. *J Cutan Pathol*, *37*(10), 1077–83. doi:10.1111/j.1600-0560.2010.01546.x
5. Callen, J. (1979). Severe cutaneous vasculitis complicating ulcerative colitis. *Arch Dermatol*, *115*(2), 226–7.
6. Cassater, D., Gambaro, G., Fabris, A., Cena, C., Calabria, S., Capelluto, S., & Lupo, A. (2006). Henoch-Schönlein purpura and Crohn's disease in a family. *J Nephrol*, *19*(3), 387–90.
7. Cerezo Rulz, A., Lenzano Grande, F., & Pérez De Luque, DJ Domínguez Jiménez, JL Rodríguez-Mancheño, AL Cortés Rodríguez, B Serrano Muñoz, A. (2010). [Leukocytoclastic vasculitis associated with ulcerative colitis]. [Article in Spanish]. *Gastroenterol Hepatol*, *33*(9), 682–3.
8. Chalvardjian, A., & Nethercott, J. (1982). Cutaneous granulomatous vasculitis associated with Crohn's disease. *Cutis*, *30*(5), 654–55.
9. Chiu, G., & Rajapakse, C. (1991). Cutaneous polyarteritis nodosa and ulcerative colitis. *J Rheumatol*, *18*(5), 768–70.
10. De Oliveira, G. T., Martins, S. S., Deboni, M., Picciarelli, P., Campos, L. M. A., Jesus, A. A., ... Silva, C. A. (2013). Cutaneous vasculitis in ulcerative colitis mimicking Henoch-Schönlein purpura. *J Crohns Colitis*, *7*(2), e69–73. doi:10.1016/j.crohns.2012.05.001
11. Dyer, N., Verbov, J., Dawson, A., Borrie, P., & Stansfeld, A. (1970). Cutaneous polyarteritis nodosa associated with Crohn's disease. *Lancet*, *1*(7648), 648–50.
12. Emanuel, P., & Phelps, R. (2008). Metastatic Crohn's disease: a histopathologic study of 12 cases. *J Cutan Pathol*, *35*(5), 457–61.
13. Feurle, G. (1977). Regional enteritis and polyarteritis nodosa. *Gastroenterology*, *72*(3), 560–1.
14. Goslen, J., Graham, W., & Lazarus, G. (1983). Cutaneous polyarteritis nodosa. Report of a case associated with Crohn's disease. *Arch Dermatol*, *119*(4), 326–9.
15. Graña Gil, J., Alonso Aquirre, P., Yebra Pimental, M., Sánchez Bursón, J., Vásquez Iglesias, J., & Galdo Fernandez, F. (1991). Cutaneous polyarteritis nodosa and Crohn's disease. *Clin Rheumatol*, *10*(2), 196–200.
16. Gudbjörnsson, B., & Hällgren, R. (1990). Cutaneous polyarteritis nodosa associated with Crohn's disease. Report and review of the literature. *J Rheumatol*, *17*(3), 386–90.
17. Hackzell-Bradley, M., Hedblad, M., & Stephansson, E. (1996). Metastatic Crohn's disease. Report of 3 cases with special reference to histopathologic findings. *Arch Dermatol*, *132*(8), 928–32.

18. Hong, J. S., Jin, S. P., Choi, M., Lee, K. L., Lee, J. H., & Cho, S. (2011). Annular leukocytoclastic vasculitis in a patient with ulcerative colitis. *Ann Dermatol*, 23(Suppl 3), S338–40. doi:10.5021/ad.2011.23.S3.S338
19. Humbert, P., Monnier, G., Billerey, C., Birgen, C., & Dupond, J. L. (1989). Polyneuropathy: an unusual extraintestinal manifestation of Crohn's disease. *Acta Neurol Scan*, 80, 301–306.
20. Iannone, F., Scioscia, C., Musio, A., Piscitelli, D., & Lapadula, G. (2003). Leucocytoclastic vasculitis as onset symptom of ulcerative colitis. *Ann Rheum Dis*, 62(8), 785–6.
21. Kahn, E. I., Daum, F., Aiges, H. W., & Silverberg, M. (1980). Cutaneous polyarteritis nodosa associated with Crohn's disease. *Dis Colon Rectum*, 23(4), 258–262.
22. Karoui, S., Bibani, N., Ben Gorbil, I., Serghini, M., Mlika, M., Braham, A., ... Filali, A. (2011). Leukocytoclastic vasculitis: A rare adverse effect secondary to infliximab. *Inflamm Bowel Dis*, 17(2), E4–5.
23. Kay, M., & Wyllie, R. (1998). Cutaneous vasculitis as the initial manifestation of Crohn's disease in a pediatric patient. *Am J Gastroenterol*, 93(6), 1014.
24. Komatsuda, A., Kinoshita, K., Togashi, M., Maki, N., Masai, R., Niitsu, H., ... Wakui, H. (2008). Cutaneous polyarteritis nodosa in a patient with Crohn's disease. *Mod Rheumatol*, 18(6), 639–42. doi:10.1007/s10165-008-0110-8
25. Limdi, J. K., Doran, H. M., & Crampton, J. R. (2010). Cutaneous vasculitis in Crohn's disease. *J Crohns Colitis*, 4(3), 351–2. doi:10.1016/j.crohns.2010.06.004
26. Mader, R., Segol, O., Adawi, M., Trougoboff, P., & Nussinson, E. (2005). Arthritis or vasculitis as presenting symptoms of Crohn's disease. *Rheumatol Int*, 25(6), 401–5. doi:10.1007/s00296-004-0470-0
27. Magnant, J., Lhommet, C., Machet, L., Machet, M., Guilmot, J., & Diot, E. (2009). [Cutaneous polyarteritis nodosa and Crohn's disease: An association not to be ignored]. [Article in French]. *Rev Med Interne*, 30(4), 345–8.
28. Marques, I., Lagos, A., Reis, J., Pinto, A., & Neves, B. (2012). Reversible Henoch-Schönlein purpura complicating adalimumab therapy. *J Crohns Colitis*, 6(7), 796–9.
29. Martin, D., Handler, T., & McDermott, J. (2011). Leucocytoclastic vasculitis in severe ulcerative colitis. *Mil Med*, 176(5), 581–3.
30. Matsumara, Y., Mizuno, K., Okamoto, H., & Imamura, S. (2000). A case of cutaneous polyarteritis nodosa associated with ulcerative colitis. *Br J Dermatol*, 142(3), 561–2.
31. McDermott, V., & McCarthy, C. (1985). A case of ulcerative colitis presenting as vasculitis purpura. *Dig Dis Sci*, 30(5), 495–6.
32. McIlwain, L., Carter, J., Bin-Sagheer, S., Vasey, F., & Nord, J. (2003). Hypersensitivity vasculitis with leukocytoclastic vasculitis secondary to infliximab. *J Clin Gastroenterol*, 36(5), 411–3.
33. Newton, J. A., McGibbon, D. H., & Marsden, R. A. (1984). Leucocytoclastic vasculitis and angio-oedema associated with inflammatory bowel disease. *Clin Exp Dermatol*, 9(6), 618–23.

34. Nobile, S., Catassi, C., & Felici, L. (2009). Herpes zoster infection followed by Henoch-Schönlein purpura in a girl receiving infliximab for ulcerative colitis. *J Clin Rheumatol*, *15*(2), 101.
35. Pastore, S., Londero, M., Gortani, G., Abate, M. V., Marchetti, F., Di Leo, G., & Ventura, A. (2010). Infliximab-related vasculitis in patients affected by ulcerative colitis. *J Pediatr Gastroenterol Nutr*, *51*(2), 226–8. doi:10.1097/MPG.0b013e3181e5e198
36. Peeters, A., van den Wall Bake, A., Daha, M., & Breeveld, F. (1990). Inflammatory bowel disease and ankylosing spondylitis associated with cutaneous vasculitis, glomerulonephritis, and circulating IgA immune complexes. *Ann Rheum Dis*, *49*(8), 638–40.
37. Plaza Santos, R., Jaquotot Herranz, M., Froilán Torres, C., Poza Cordón, J., Casado Verrier, B., de Tena Díaz-Agero, F. L., ... Suárez de Parga, J. M. (2010). [Leukocytoclastic vasculitis associated with Crohn's disease]. [Article in Spanish]. *Gastroenterol Hepatol*, *33*(6), 433–5. doi:10.1016/j.gastrohep.2009.07.004
38. Pozdnyakova, O., Garg, A., & Mahalingam, M. (2008). Nodular vasculitis - a novel cutaneous manifestation of autoimmune colitis. *J Cutan Pathol*, *35*(3), 315–9. doi:10.1111/j.1600-0560.2007.00797.x
39. Rahman, F., Takhar, G., Roy, O., Shepherd, A., Bloom, S., & McCartney, S. (2010). Henoch-Schönlein purpura complicating adalimumab therapy for Crohn's disease. *World J Gastrointest Pharmacol Ther*, *1*(5), 119–22.
40. Sabat, M., Leulmo, J., & Saez, A. (2005). Cutaneous granulomatous vasculitis in metastatic Crohn's disease. *J Eur Acad Dermatol Venereol*, *19*(5), 652–3. doi:10.1111/j.1468-3083.2005.01230.x
41. Saulsbury, F. T., & Hart, M. H. (2000). Crohn's disease presenting with Henoch-Schönlein purpura. *J Pediatr Gastroenterol Nutr*, *31*(2), 173–175.
42. Shum, D., & Guenther, L. (1990). Metastatic Crohn's disease. Case report and review of the literature. *Arch Dermatol*, *126*(5), 648–8.
43. Slater, D., Waller, P., & Reilly, G. (1985). Cutaneous granulomatous vasculitis: presenting feature of Crohn's disease. *J R Soc Med*, *78*(7), 589–90.
44. Sokumbi, O., Wetter, D., Makol, A., & Warrington, K. (2012). Vasculitis associated with tumor necrosis factor- $\alpha$  inhibitors. *Mayo Clin Proc*, *87*(8), 739–45.
45. Solley, G., Winkelmann, R., & Rovelstad, R. (1975). Correlation between regional enteritis and cutaneous polyarteritis nodosa: two cases and review of the literature. *Gastroenterology*, *69*, 235–9.
46. Speiser, J. C., Moore, T. L., & Zuckner, J. (1985). Ulcerative colitis with arthritis and vasculitis. *Clin Rheumatol*, *4*(3), 343–7.
47. Swaminath, A., Magro, C. M., & Dwyer, E. (2011). Refractory urticarial vasculitis as a complication of ulcerative colitis successfully treated with rituximab. *J Clin Rheumatol*, *17*(5), 281–3. doi:10.1097/RHU.0b013e3182288400
48. Tatnall, F., Dodd, H., & Sarkany, I. (1987). Crohn's disease with metastatic cutaneous involvement and granulomatous cheilitis. *J R Soc Med*, *80*(1), 49–51.

49. Tripodi Cutrì, F., Salerno, R., Lo Schiavo, A., Gravina, G., Romano, M., & Ruocco, E. (2009). Ulcerative colitis associated with leukocytoclastic vasculitis of the skin. *Dig Liver Dis*, 41(7), e42–4. doi:10.1016/j.dld.2008.06.018
50. Tsiamoulos, Z., Karamanolis, G., Polymeros, D., Triantafyllou, K., & Oikonomopoulos, T. (2008). Leukocytoclastic vasculitis as an onset symptom of Crohn's disease. *Case Rep Gastroenterol*, 2(3), 410–4. doi:10.1159/000161562
51. Verbov, J. (1980). Cutaneous polyarteritis nodosa in a young child. *Arch Dis Child*, 55(7), 569–72.
52. Vesel, H., & Eithz, C. (1998). [Pulmonary vasculitis as an extraintestinal manifestation in ulcerative colitis]. *Ugeskr Laeger*, 160(14), 2116–7.
53. Volk, D., & Owen, L. (1986). Cutaneous polyarteritis nodosa in a patient with ulcerative colitis. *J Pediatr Gastroenterol Nutr*, 5(6), 970–2.
54. Voulgarelis, M., Chorti, M., Kittas, C., Karachristos, A., Ikononopoulos, G., & Skopouli, F. (1998). Fever and abdominal pain in a 45-year-old woman with cutaneous necrotising vasculitis. *Clin Exp Rheumatol*, 16(1), 72–6.
55. Wackers, F. J., Tytgat, G. N., & Vreeken, J. (1974). Necrotizing vasculitis and ulcerative colitis. *Br Med J*, 4(5936), 83–4.
56. Zlatanic, J., Fleisher, M., Sasson, M., Kim, P., & Korelitz, B. (1996). Crohn's disease and acute leukocytoclastic vasculitis of skin. *Am J Gastroenterol*, 91(11), 2410–3.

#### **ANCA-associated vasculitides with inflammatory bowel disease**

1. Bar-Dayyan, Y., Ben-Zikrie, S., Fraser, G., Ben-Ari, Z., Braun, M., Kremer, M. R., & Niv, Y. (2002). Pulmonary alveolar hemorrhage in a patient with ulcerative colitis and primary sclerosing cholangitis. *Isr Med Assoc J*, 4(6), 464–5.
2. Codish, S., Abu-Shakra, M., Depsames, R., Sion-Vardy, N., Benharroch, D., & Sukenik, S. (2000). Wegener's granulomatosis in a patient with Crohn's disease. *Isr Med Assoc J*, 2(8), 630–631.
3. Dos Santos, C. E., Dal Pizzol, V. I., Aragão, S. C., Rachid Filho, A., & Marques, F. M. (2013). c-ANCA associated vasculitis in patients with ulcerative colitis: case report. *Revista Brasileira de Reumatologia*, 53(5), 441–3.
4. Jacob, S. E., Martin, L. K., & Kerdel, F. a. (2003). Cutaneous Wegener's granulomatosis (malignant pyoderma) in a patient with Crohn's disease. *Int J Dermatol*, 42(11), 896–898. doi:10.1046/j.1365-4362.2003.01919.x
5. Nishimura, J., Yamada, A., & Araki, H. (1984). A case of Takayasu's disease associated with ulcerative colitis: An important role of HLA-BW52 in its pathogenesis. *Jpn J Soc Internal Med*, 73, 140.
6. Okata, H., Yoshihira, A., & Kawamura, H. (1985). A case of aortitis syndrome associated with ulcerative colitis and pyoderma gangrenosum. *Jpn J Soc Internal Med*, 74, 82.
7. Ouazzani, A., Sokolow, Y., Hanebaly, M., Rondelet, B., Patino, M., Rimmelink, M., ... Cogan, E. (2011). [Pulmonary granulomatous necrotizing vasculitis: an extra-intestinal manifestation of ulcerative colitis or Wegener's granulomatosis?]. [Article in French]. *Rev Med Brux*, 32(2), 93–97.

8. Panani, A. D., Grigoriadou, M., Magira, E., Roussos, C., & Raptis, S. A. (2006). Perinuclear antineutrophil cytoplasmic antibody myeloperoxidase-positive vasculitis in association with ulcerative colitis. *Clin Rheumatol*, *25*(1), 35–7. doi:10.1007/s10067-005-1124-7
9. Prekates, A., Orfanos, S., Routsis, C., Ch Pantelidaki, A., & Roussos, C. (2002). Churg-Strauss syndrome occurring 30 years after the onset of ulcerative colitis. *Respir Care*, *47*(2), 167–70.
10. Satchell, S., Anthony, P., & Nicholls, A. (1999). Systemic vasculitis and p-ANCA positivity developing in a patient with ulcerative colitis and the antiphospholipid syndrome. *Nephron*, *83*(4), 365–7.
11. Vaszar, L., Orzechowski, N., Specks, U., Ytterberg, S., Loftus, E. jr., Mark, E., & Tazelaar, H. (2014). Coexistent pulmonary granulomatosis with polyangiitis (wegener granulomatosis) and crohn disease. *Am J Surg Pathol, Am J Surg* (38), 354–9.
12. Weir, A., Taylor-Robinson, S., Poole, S., Pignatelli, M., Walters, J., & Calam, J. (1997). Cytoplasmic antineutrophil cytoplasmic antibody-positive vasculitis associated with ulcerative colitis. *Am J Gastroenterol*, *92*(3), 506–8.

#### **Other vasculitides with inflammatory bowel disease**

1. Adamek, R., Wegener, M., Wedmann, B., Büttner, T., & Ricken, D. (1993). [Cerebral vasculitis in Crohn disease]. [Article in German]. *Leber Magen Darm*, *23*(2), 91–3.
2. Al-Beladi, F. I., Al-Fawaz, M. A., Al-Solami, E. A., & Al-Solami, R. A. (2012). Possible central nervous system vasculitis as an early presentation of Crohn's disease. A challenge in diagnosis and management. *Saudi Med J*, *33*(9), 1025–1027.
3. Bonrath, E., Rijcken, E., Dziewas, R., Vieth, V., Bettenworth, D., Senninger, N., & Brüwer, M. (2010). [Cerebral vasculitis as rare extraintestinal manifestation in ulcerative colitis: review of the literature and case report]. [Article in German]. *Zentralbl Chir*, *135*(4), 350–3.
4. Brohee, P., Violon, P., Mavroudakos, N., Pirote, B., Brotchi, J., Zegers de Beyl, D., & Hildebrand, J. (1997). Central nervous system lesions associated with Crohn's disease. *J Neuroimaging*, *7*(3), 195–8.
5. Carmona, M., Jaume Anselmi, F., & Ramirez Rivera, J. (2000). Cerebral thrombosis and vasculitis: an uncommon complication of ulcerative colitis. *Bol Asoc Med P R*, *92*(1-3), 9–11.
6. Choi, J.-Y., Yu, C. H., Jung, H.-Y., Jung, M. K., Kim, Y.-J., Cho, J.-H., ... Park, S.-H. (2012). A case of rapidly progressive IgA nephropathy in a patient with exacerbation of Crohn's disease. *BMC Nephrol*, *13*(1), 84. doi:10.1186/1471-2369-13-84
7. Civan, J. M., Gilbert, C. R., & Kastenber, D. M. (2011). Pulmonary capillaritis: a rare extra-intestinal manifestation of inflammatory bowel disease. *Am J Gastroenterol*, *106*(4), 804–5. doi:10.1038/ajg.2011.46
8. Collins, W., Bendig, D., & Taylor, W. (1979). Pulmonary vasculitis complicating childhood ulcerative colitis. *Gastroenterology*, *77*(5), 1091–3.

9. Dabadie, A., Gié, S., Taque, S., Babut, J., & Roussey, M. (1996). [Glomerular nephropathy with IgA mesangium deposits and Crohn disease]. [Article in French]. *Arch Pediatr*, 3(9), 884–887.
10. Disdier, P., Swiader, L., Harlé, J., Pellissier, J., Figarella-Branger, D., Veit, V., ... Weiller, P. (1997). Crohn's disease and gastrocnemius vasculitis: two new cases. *Am J Gastroenterol*, 92(5), 880–2.
11. Doerfer, J., & Wässer, S. (1986). Kawasaki disease associated with ulcerative colitis. *European Journal of Pediatrics*, 145(5), 448–9.
12. Duker, J., Brown, G., & Brooks, L. (1987). Retinal vasculitis in Crohn's disease. *Am J Ophthalmol*, 103(5), 664–8.
13. Filiopoulos, V., Trompouki, S., Hadjiyannakos, D., Paraskevakou, H., Kamperoglou, D., & Vlassopoulos, D. (2010). IgA nephropathy in association with Crohn's disease: a case report and brief review of the literature. *Ren Fail*, 32(4), 523–7. doi:10.3109/08860221003710554
14. Forrest, J., & Shearman, D. (1975). Pulmonary vasculitis and ulcerative colitis. *Am J Dig Dis*, 20(5), 482–6.
15. Forshaw, M. J., Guirguis, O., & Hennigan, T. W. (2005). IgA nephropathy in association with Crohn's disease. *Int J Colorectal Dis*, 20(5), 463–5. doi:10.1007/s00384-004-0696-z
16. Garcia-Diaz, M., Mira, M., Nevado, L., Galván, A., Berenguer, A., & Bureo, J. C. (1995). Retinal vasculitis associated with Crohn's disease. *Postgrad Med J*, 71(833), 170–172. doi:10.1136/pgmj.71.833.170
17. Gilliam, J. 3rd, Challa, V., Aquedelo, C., Albertson, D., & Huntley, C. (1981). Vasculitis involving muscle associated with Crohn's colitis. *Gastroenterology*, 81(4), 787–90.
18. Gobbelé, R., Reith, W., & Block, F. (2000). [Cerebral vasculitis as a concomitant neurological illness in Crohn's disease]. [Article in German]. *Nervenarzt*, 71(4), 299–304.
19. Hibbs, A., Bznic-Cizman, B., Guttenberg, M., Goldeberg, B., & Meyers, K. (2001). Ulcerative colitis in a renal transplant patient with previous Goodpasture disease. *Pediatr Nephrol*, 16(7), 543–6.
20. Hirsch, D., Jindal, K., Trillo, A., & Cohen, A. (1992). Acute renal failure in Crohn's disease due to IgA nephropathy. *Am J Kidney Dis*, 20(2), 189–90.
21. Holzer, K., Esposito, L., Stimmer, H., Hemmer, B., & Poppert, H. (2009). Cerebral vasculitis mimicking migraine with aura in a patient with Crohn's disease. *Acta Neurol Belg*, 109(1), 44–48.
22. Hubert, D., Beaufils, M., & Meyrier, A. (1984). [Immunoglobulin A glomerular nephropathy associated with inflammatory colitis. Apropos of 2 cases]. [Article in French]. *Presse Med*, 13(17), 1083–5.
23. Ikeda, Y., Migita, K., Ito, M., Miyazato, M., Okamoto, K., Eguchi, K., ... Shikuwa, S. (2006). A case of classical polyarteritis nodosa complicated by ulcerative colitis. *Am J Med Sci*, 332(3), 137–9. Retrieved from <http://www.ncbi.nlm.nih.gov/pubmed/16969144>
24. Isenberg, J., Goldstein, H., Korn, A., Ozeran, R., & Rosen, V. (1968). Pulmonary vasculitis--an uncommon complication of ulcerative colitis. Report of a case. *N Engl J Med*, 279(25), 1376–7.

25. Kammerer, J., Genin, I., Michel, P., & Gassmann Cosme, H. (1994). IgA glomerulonephritis associated with Crohns disease. *IgA Glomerulonephritis Associated with Crohns Disease*, 18(3), 293.
26. Kedziora, J., Wolff, M., & Chang, J. (1975). Limited form of Wegener's granulomatosis in ulcerative colitis. *Am J Roentgenol Radium Ther Nucl Med*, 125(1), 127–33.
27. Kim, J., Bae, J., Jung, E., Kim, Y., Lee, Y., Kim, K., ... Lee, D. (2006). A Case of Goodpasture's Syndrome Combined with Crohn's Disease. *Tuberc Respir Dis*, 61(4), 384–8.
28. Krapf, H., Sailer, A., & Mundinger, P. (2000). Zerebrale Vaskulitis als seltene Komplikation eines Morbus Crohn: Stellenwert der bildgebenden Verfahren. *Klinische Neuroradiologie*, 10(1), 29–34.
29. Lee, J. M., Lee, K. M., Kim, H. W., Chung, W. C., Paik, C. N., Lee, J. R., ... Yang, J. M. (2008). [Crohn's disease in association with IgA nephropathy]. [Article in Korean]. *Korean J Gastroenterol*, 52(2), 115–119.
30. Lida, H., Asaka, M., Izumino, K., Takata, M., Sasayama, S., & Tanaka, M. (1989). IgA nephropathy complicated by ulcerative colitis. *Nephron*, 53, 285.
31. López Barbarín, J., Lafuente Martínez, P., García Campos, F., Ibarra Peña, B., & Díaz de Otazu, R. (1990). [Crohn's disease associated with Berger's disease. A rare complication]. [Article in Spanish]. *Rev Esp Enferm Dig*, 78(4), 233–5.
32. Macoull, K. (1970). Ocular changes in granulomatous ileocolitis. *Arch Ophthalmol*, 84(1), 95–7.
33. Masaki, T., Muto, T., Shinozaki, M., & Kuroda, T. (1997). Unusual cerebral complication associated with ulcerative colitis. *J Gastroenterol*, 32(2), 251–254.
34. Matsuo, T., & Yamaoka, A. (1998). Retinal vasculitis revealed by fluorescein angiography in patients with inflammatory bowel disease. *Jpn J Ophthalmol*, 42(5), 398–400.
35. Mccallum, D., Smith, L., Harley, F., & Yiu, V. (1997). IgA nephropathy and thin basement membrane disease in association with Crohn disease. *Pediatr Nephrol*, 11(5), 637–640.
36. Nakamura, T., Suzuki, Y., & Koide, H. (2003). Granulocyte and monocyte adsorption apheresis in a patient with antiglomerular basement membrane glomerulonephritis and active ulcerative colitis. *Am J Med Sci*, 325, 296–8.
37. Nelson, J., Barron, M., Riggs, J., Gutmann, L., & Schochet, S. J. (1986). Cerebral vasculitis and ulcerative colitis. *Neurology*, 36(5), 719–21.
38. Nomoto, T., Nagao, T., Hirabayashi, K., Seta, T., Yokochi, M., Katsura, K., & Katayama, Y. (2006). Cerebral arteriopathy with extracranial artery involvement in a patient with ulcerative colitis. *J Neurol Sci.*, 243(1-2), 87–9. doi:10.1016/j.jns.2005.11.004
39. Onime, A., Agaba, E. I., Sun, Y., Parsons, R. B., Servilla, K. S., Massie, L. W., & Tzamaloukas, A. H. (2006). Immunoglobulin A nephropathy complicating ulcerative colitis. *Int Urol Nephrol*, 38(2), 349–53. doi:10.1007/s11255-006-0061-y
40. Özdemir, Y., Cosar, C. B., Önder, F., Kural, G., & Dagli, Ü. (2000). Ocular complications in inflammatory bowel disease. *Ann Ophthalmol*, 32(3), 245–8.

41. Pandian, J. D., Henderson, R. D., O'Sullivan, J. D., & Rajah, T. (2006). Cerebral vasculitis in ulcerative colitis. *Arch Neurol*, *63*(5), 780.  
doi:10.1001/archneur.63.5.780
42. Pinçon, E., Bouguen, G., Coiffier, G., Rivalan, J., Le Pogamp, P., Rioux-Leclercq, N., & Vigneau, C. (2010). Anti-glomerular basement membrane disease, ulcerative colitis, and primary sclerosing cholangitis: link or coincidence? *Nephrology Reviews*, *2*(2), 47–48.
43. Plaisier, E., Borradori, L., Hellmark, T., Wattiaux, M., Flageul, B., Mougenot, B., & Ronco, P. (2002). Anti-glomerular basement membrane nephritis and bullous pemphigoid caused by distinct anti-alpha 3(IV)NC1 and anti-BP180 antibodies in a patient with Crohn's disease. *Am J Kidney Dis*, *40*(3), 649–54.
44. Rosen, D., Cologne, K., Popek, S., Sung, B., Ortega, A., & Senagore, A. (2012). Recurrent drug-induced ANCA vasculitis in a patient with Crohn's colitis treated with infliximab: a potential contraindication to immunosuppressive therapy. *Am Surg*, *78*(12), 1406–8.
45. Ruby, A., & Jampol, L. (1990). Crohn's disease and retinal vascular disease. *Am J Ophthalmol*, *110*(4), 349–53.
46. Saatci, O., Koçak, N., Durak, I., & Ergin, M. (2002). Unilateral retinal vasculitis, branch retinal artery occlusion and subsequent retinal neovascularization in Crohn's disease. *Int Ophthalmol*, *24*(2), 89–92.
47. Salmon, J. F., Ursell, P. G., & Frith, P. (2000). Neovascular glaucoma as a complication of retinal vasculitis in Crohn disease. *Am J Ophthalmol*, *130*(4), 528–30.
48. Sargent, D., Sessions, J., & Fairman, R. (1985). Pulmonary vasculitis complicating ulcerative colitis. *South Med J*, *78*(5), 624–5.
49. Schluter, A., Krasnianski, M., Krivokuca, M., Spielmann, R. P., Neudecker, S., & Hirsch, W. (2004). Magnetic resonance angiography in a patient with Crohn's disease associated cerebral vasculitis. *Clin Neurol Neurosurg*, *106*(2), 110–3.  
doi:10.1016/j.clineuro.2003.09.004
50. Sedwick, L., Klingele, T., Burde, R., & Behrens, M. (1984). Optic neuritis in inflammatory bowel disease. *J Clin Neuroophthalmol*, *4*(1), 3–6.
51. Selby, L., Harris, C., & DeVilliers, W. (2003). Crohn's disease, infliximab treatment and IgA nephropathy. *Amer J Gastroenterol*, *98*, S199.
52. Shaer, A. J., Stewart, L. R., Cheek, D. E., Hurray, D., & Self, S. E. (2003). Selected Features of Patients With Glomerulonephritis Associated With IBD, *41*(5), 1097–1109.
53. Shaer, A., Stewart, L., Cheek, D., Hurray, D., & Self, S. (2003). IgA antiglomerular basement membrane nephritis associated with Crohn's disease: a case report and review of glomerulonephritis in inflammatory bowel disease. *Am J Kidney Dis*, *41*(5), 1097–9.
54. Silverman, M. (1984). Polyarteritis nodosa associated with ulcerative colitis. *J Rheumatol*, *11*(3), 377–9.
55. Soejima, A., Nakabayasi, K., Kitamoto, K., Nagasawa, T., Matsumoto, K., & Kozaki, M. (1988). [IgA nephropathy in a patient with ulcerative colitis] [Article in Japanese]. *Nihon Naika Gakkai Zasshi*, *77*(5), 685–9.



56. Sokumbi, O., Wetter, D., Makol, A., & Warrington, K. (2012). Vasculitis associated with tumor necrosis factor- $\alpha$  inhibitors. *Mayo Clin Proc*, 87(8), 739–45.
57. Soomro, H., Armstrong, M., Graham, E. M., & Stanford, M. R. (2006). Sudden loss of vision caused by a vasculitic ophthalmic artery occlusion in a patient with ankylosing spondylitis and Crohn's disease. *Br J Ophthalmol*, 90(11), 1438.
58. Sykes, S., & Horton, J. (1997). Steroid-responsive retinal vasculitis with a frosted branch appearance in Crohns disease. *Retina*, 17(5), 451–4.
59. Takemura, T., Okada, M., Yagi, K., Kuwajima, H., & Yanagida, H. (2002). An adolescent with IgA nephropathy and Crohn disease: pathogenetic implications. *Pediatr Nephrol*, 17(10), 863–6. doi:10.1007/s00467-002-0943-x
60. Trimarchi, H., Lotti, A., Lotti, R., Freixas, E., & Peters, R. (2001). Immunoglobulin A nephropathy and ulcerative colitis. A focus on their pathogenesis. *Am J Nephrol*, 21(5), 400–405.
61. Trojet, S., Mazlout, H., Hamdouni, M., Toumi, A., Jebali, F., Cheour, M., ... Kraiem, A. (2010). [Retinal vasculitis in Crohn's disease: a case report] [Article in French]. *J Fr Ophthalmol*, 33(1), 54.e1–5.
62. Ueno, Y., Tanaka, S., Onitake, T., Hanaoka, R., Yoshioka, K., Ito, M., & Chayama, K. (2009). Infliximab treatment for Crohn's disease in a patient with IgA nephropathy. *Clin J Gastroenterol*, 2(6), 380–383. doi:10.1007/s12328-009-0112-x
63. Ullrich, S., Schinke, S., Both, M., Knop, K. C., Kirkiles-Smith, N. C., Gross, W. L., & Lamprecht, P. (2009). Refractory central nervous system vasculitis and gastrocnemius myalgia syndrome in Crohn's disease successfully treated with anti-tumor necrosis factor-alpha antibody. *Semin Arthritis Rheum*, 38(5), 337–47. doi:10.1016/j.semarthrit.2008.01.008
64. Unnikrishnan, A., Azodi, S., Ansari, N., Brown, M., Kamnetz, J., & Uchiyama, R. C. (2014). Case Report PR3ANCA Related Cerebral Vasculitis in Ulcerative Colitis Presenting with Orbital Involvement : A Case Report with Review of Literature. *Case Reports in Rheum*, 2014. doi:10.1155/2014/582094
65. Vesel, H., & Eithz, C. (1998). [Pulmonary vasculitis as an extraintestinal manifestation in ulcerative colitis]. *Ugeskr Laeger*, 160(14), 2116–7.
66. Youm, J., Lee, O., Park, M., Yang, S., Han, S., Baek, Y., ... Kee, C. (2006). [Crohn's disease associated with IgA nephropathy]. [Article in Korean]. *Korean J Gastroenterol*, 47(4), 324–8.
